# Supplementary material for: DFT and TD-DFT studies of new triphenylamine-based (D–A–D) donor materials for high-efficiency organic solar cells
Source: Royal Society of Chemistry journal article supplement (doi:10.1039/d2ma00048b), 2022-01-01
Supplement: d2ma00048b1.pdf [file d2ma00048b1.pdf]

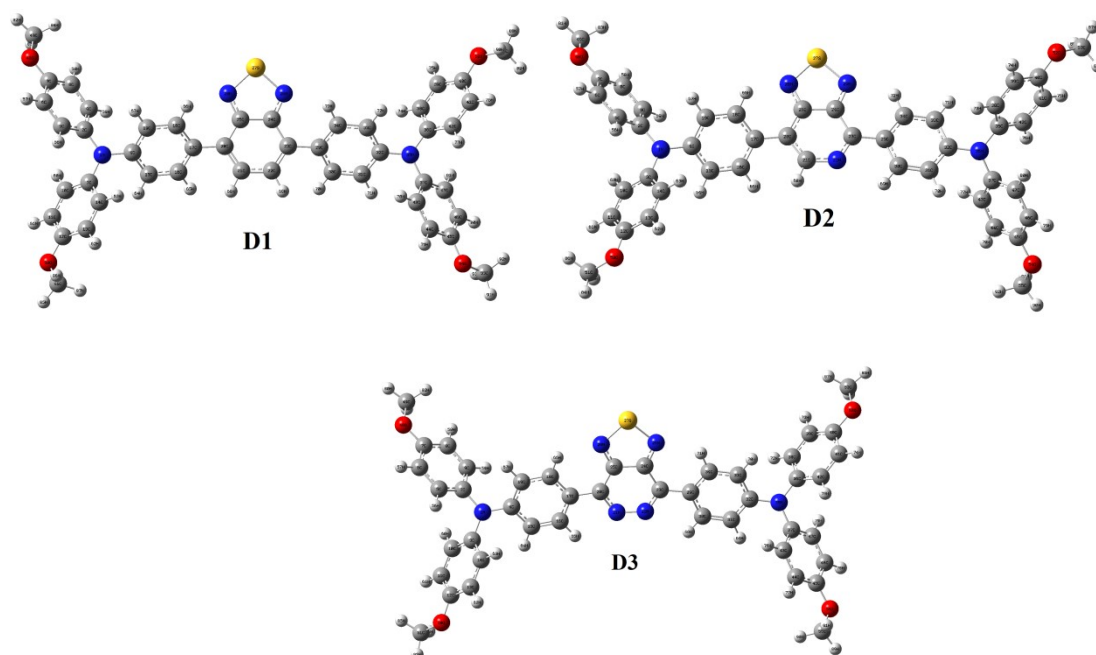

Figure S1. Optimized geometric structures of designed donors(D1,D2 and D3) in solvent phase.

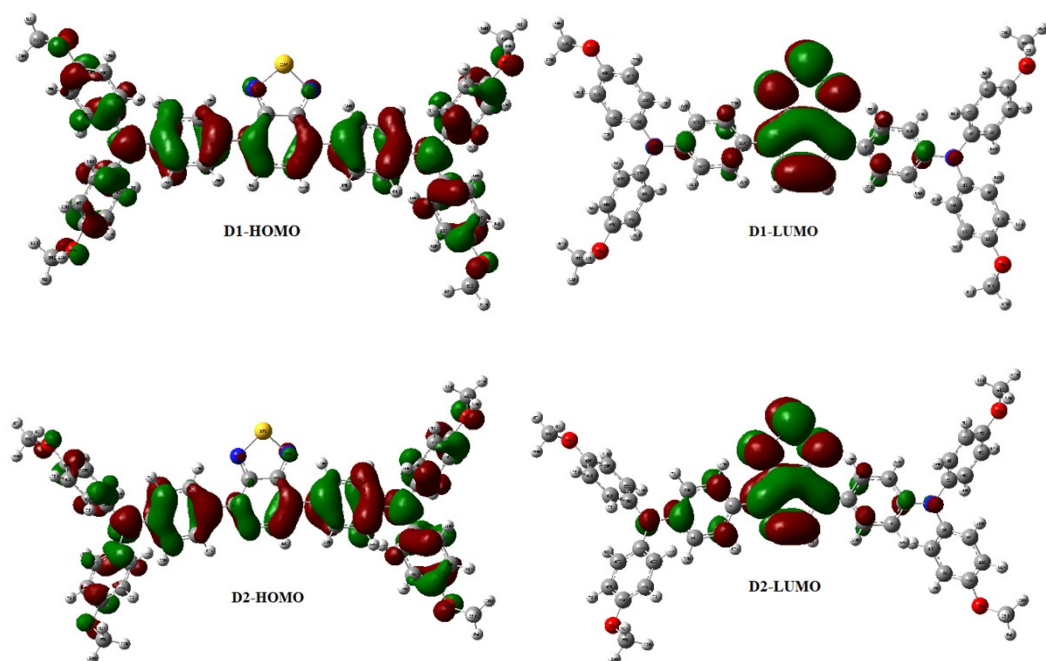

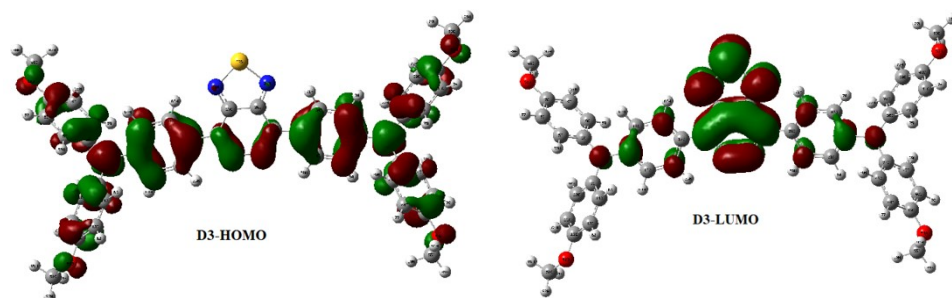

Figure S2. Contours of the HOMO and LUMO of D-A-D in the solvent phase.

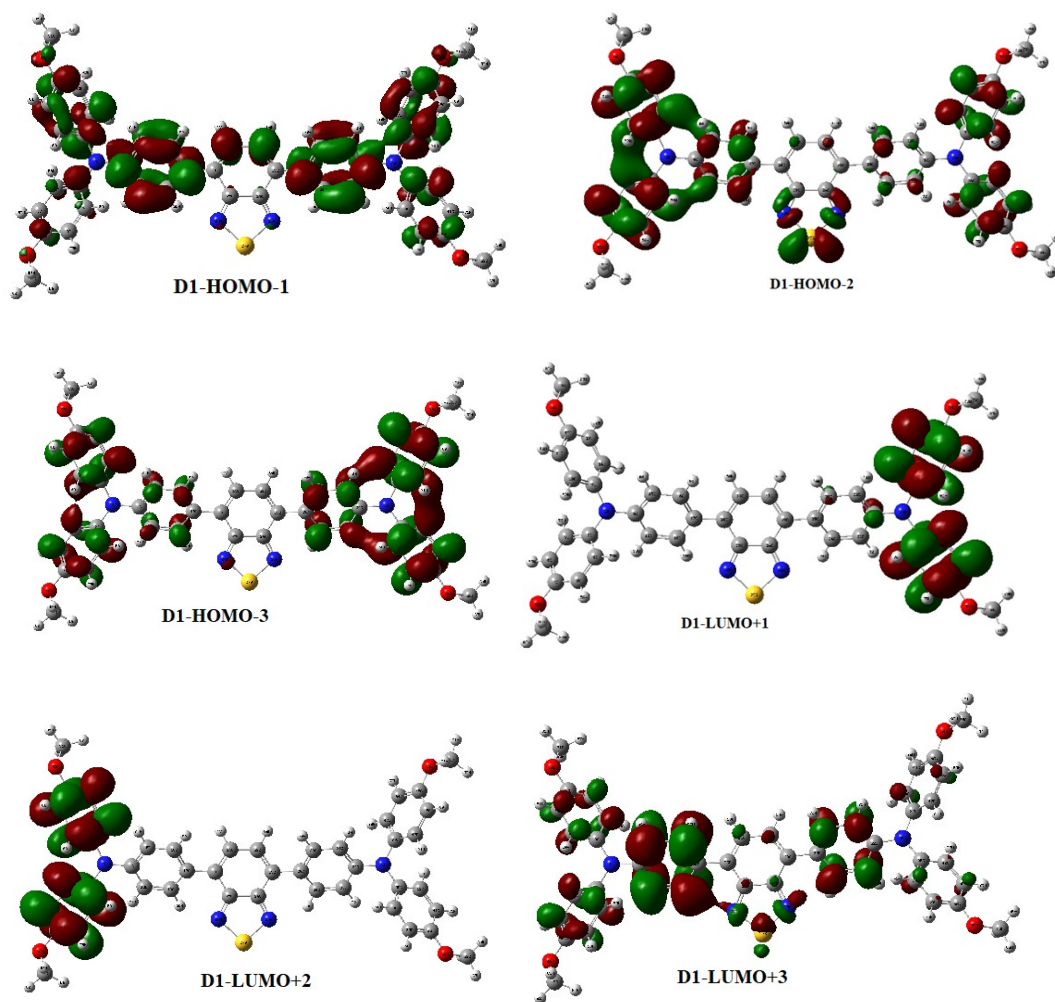

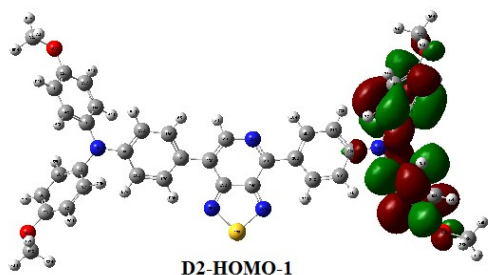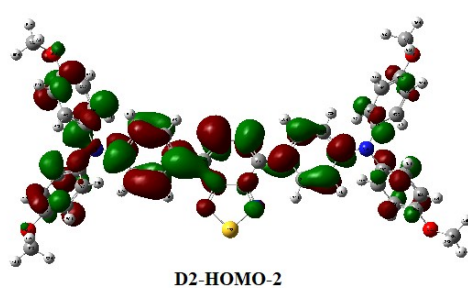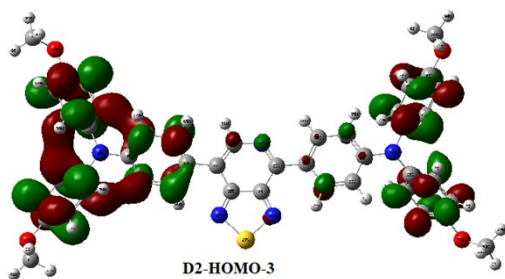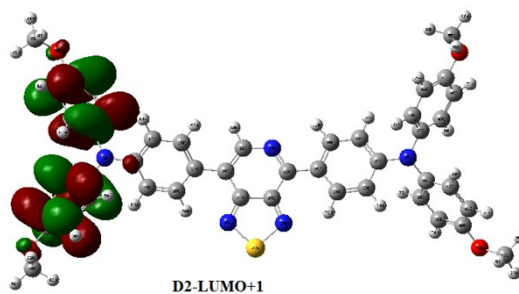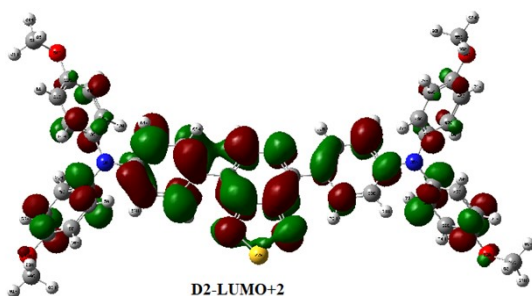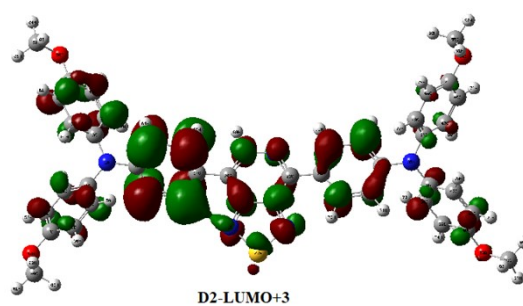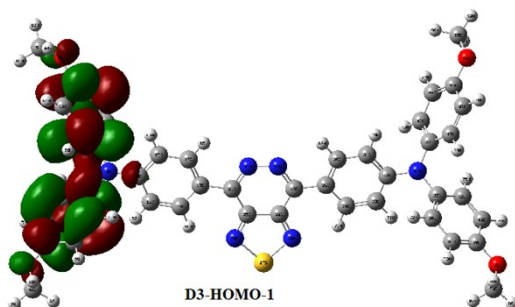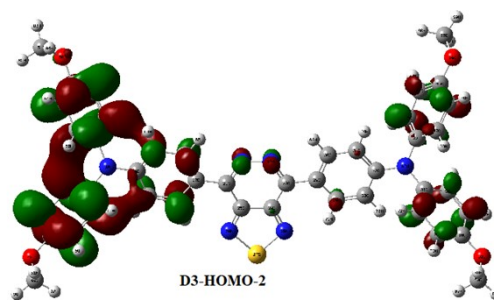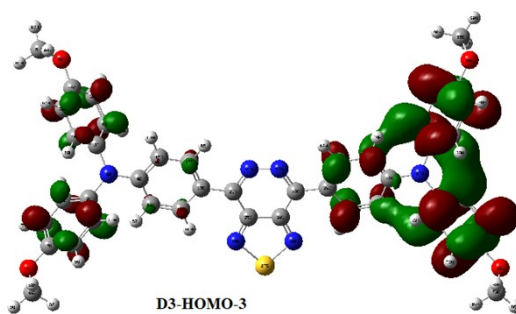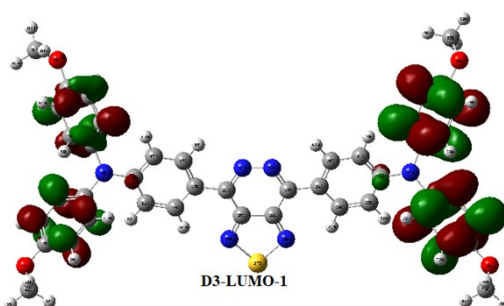

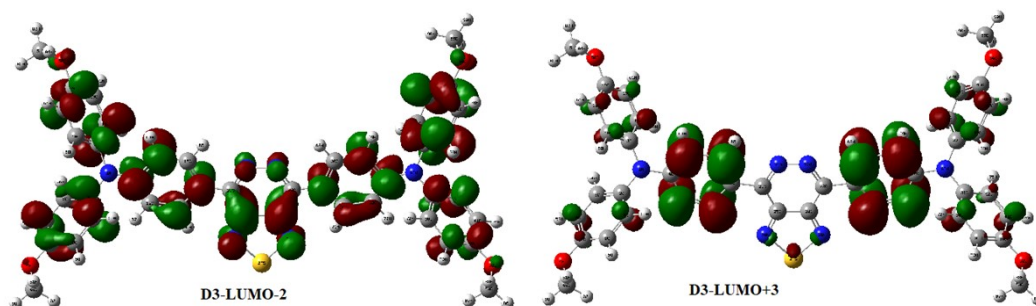

Figure S3. Contours of the HOMO-1, HOMO-2 HOMO-3 and LUMO+1, LUMO+2, LUMO+3 Orbitals for D1,D2 and D3 monomers in the gas phase.

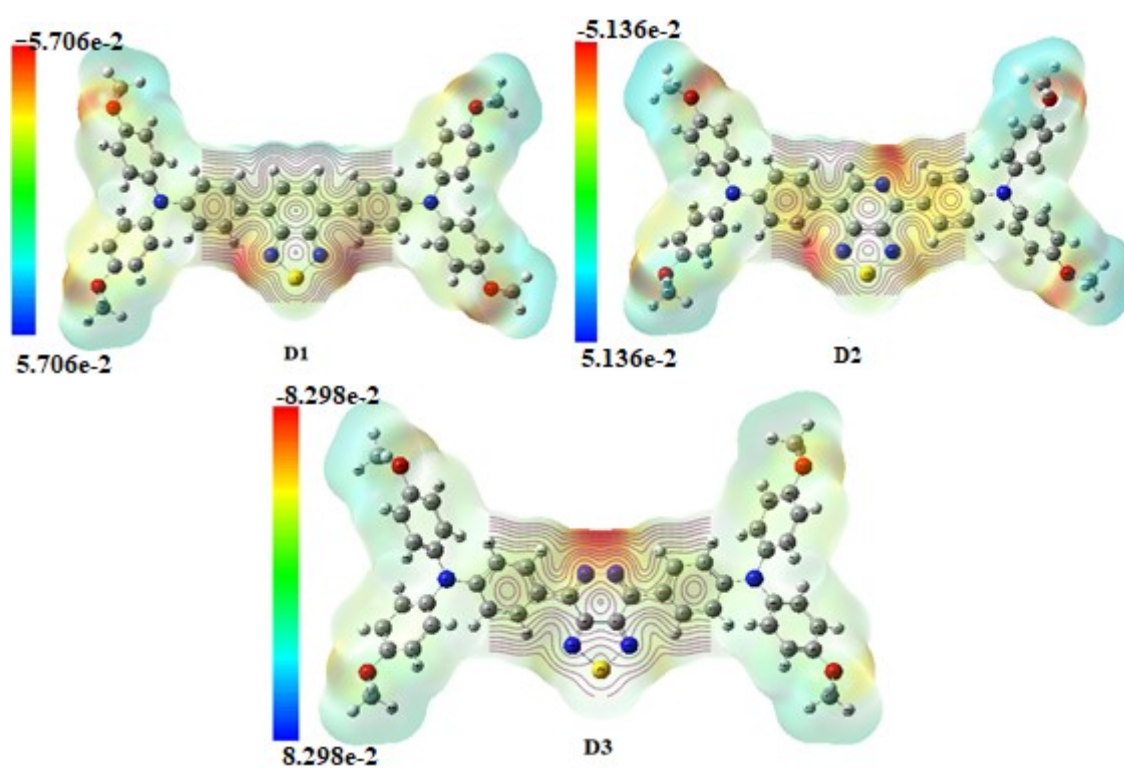

Fig. S4. MEP maps representation of designed molecules (D1-D3) in the gas solvent phase.



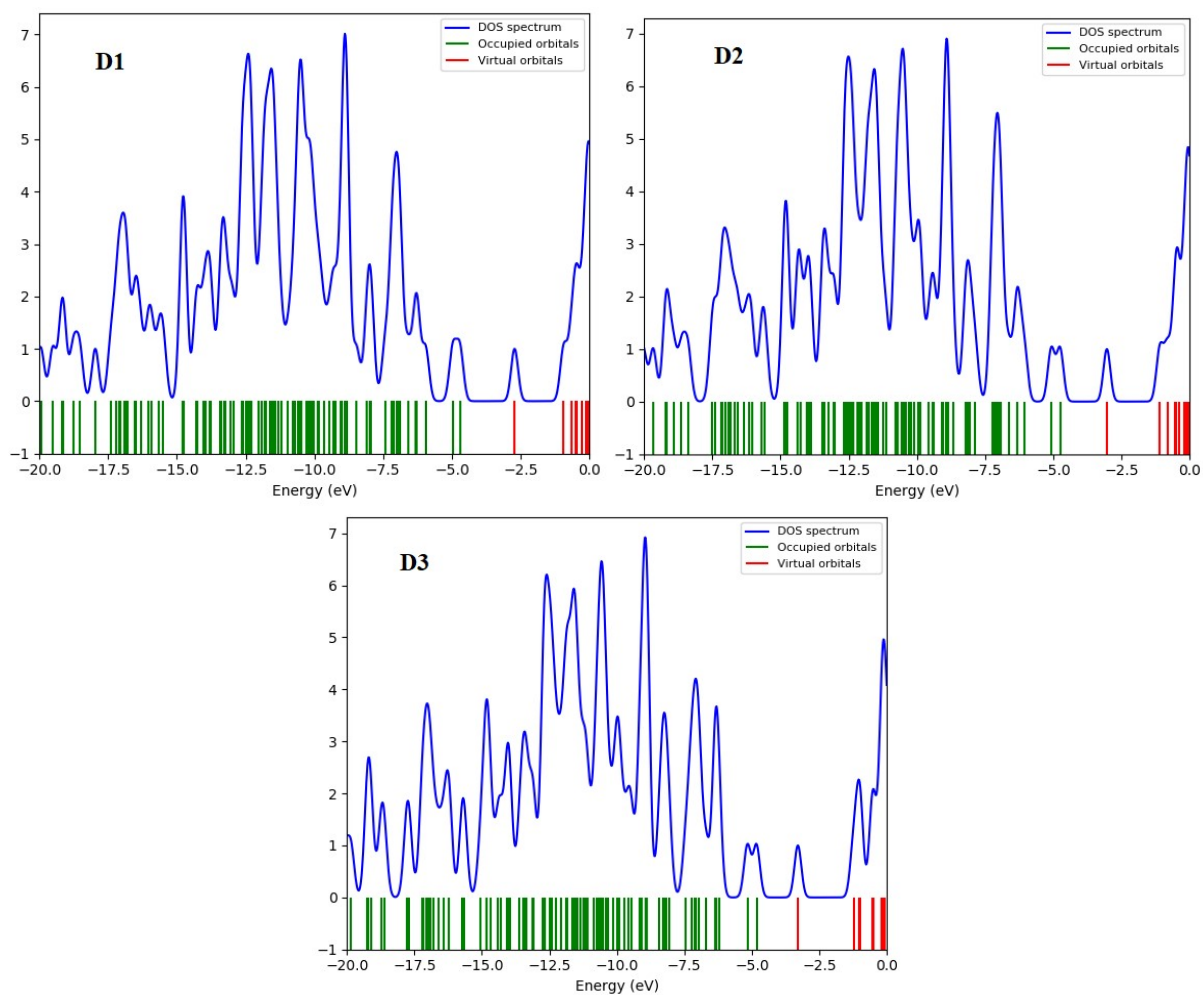

Fig. S5. DOS plots of designed molecules D1-D3 in the solvent phase.
